# Supplementary material for: How well did Norwegian general practice prepare to address the COVID-19 pandemic?
Source: PubMed Central journal article supplement — Fam Med Community Health. 2020 Dec 4;8(4):e000512. doi: 10.1136/fmch-2020-000512 (PMC7722348; doi:10.1136/fmch-2020-000512), 2020-12-04
Supplement: fmch-2020-000512supp001.pdf [file fmch-2020-000512supp001.pdf]

Supplemental:

**Worksheet used at the group meeting:**

|                                                                                                    |
|----------------------------------------------------------------------------------------------------|
| Is the information on the website updated and good? (yes;no)                                       |
| Is the notice on the entrance door sufficient? (yes;no)                                            |
| Do you have an isolation room at the office? (yes;no)                                              |
| Do you have enough personal protective equipment? (yes;no)                                         |
| Does everyone know how to put on and take off personal protective equipment? (yes;no)              |
| Does everyone know how to handle personal protective equipment? (yes;no)                           |
| Does everyone know how to decontaminate a room after use? (yes;no)                                 |
| Do you have necessary equipment including two waste bags needed for home visits? (yes;no)          |
| Has the municipality established a separate "respiratory clinic"? (yes;no)                         |
| Have you split doctors and other personnel into separate teams? (yes;no)                           |
| Do the GPs have access to home office? (yes, everybody; yes, but not everybody, no)                |
| Do the health secretaries have access to home office? (yes, everybody; yes, but not everybody, no) |
| Do the GPs offer video consultations? (yes, everybody; yes, but not everybody, no)                 |
| Do the GPs offer text-based online consultations? (yes, everybody; yes, but not everybody, no)     |
